# Supplementary material
Source: ML conference proceedings conference paper supplement (https://aclanthology.org/2026.semeval-1.5)
Supplement: SupplementaryMaterial [file Methodology_diagram.pdf › figures/Methodology_diagram.pdf]

- Used for evasion task
- Used for clarity task

# Unmasking Political Question Evasions Approaches

**Hierarchical**

**Baseline Flat**

**Multitask Learning**

**Clear Reply  
vs Rest**

**Clear Non-Reply  
vs Rest**

**Independent**

**Joint**

**Constrained**
