# Supplementary material
Source: ML conference proceedings conference paper supplement (https://aclanthology.org/2026.semeval-1.5)

- Used for evasion task
- Used for clarity task

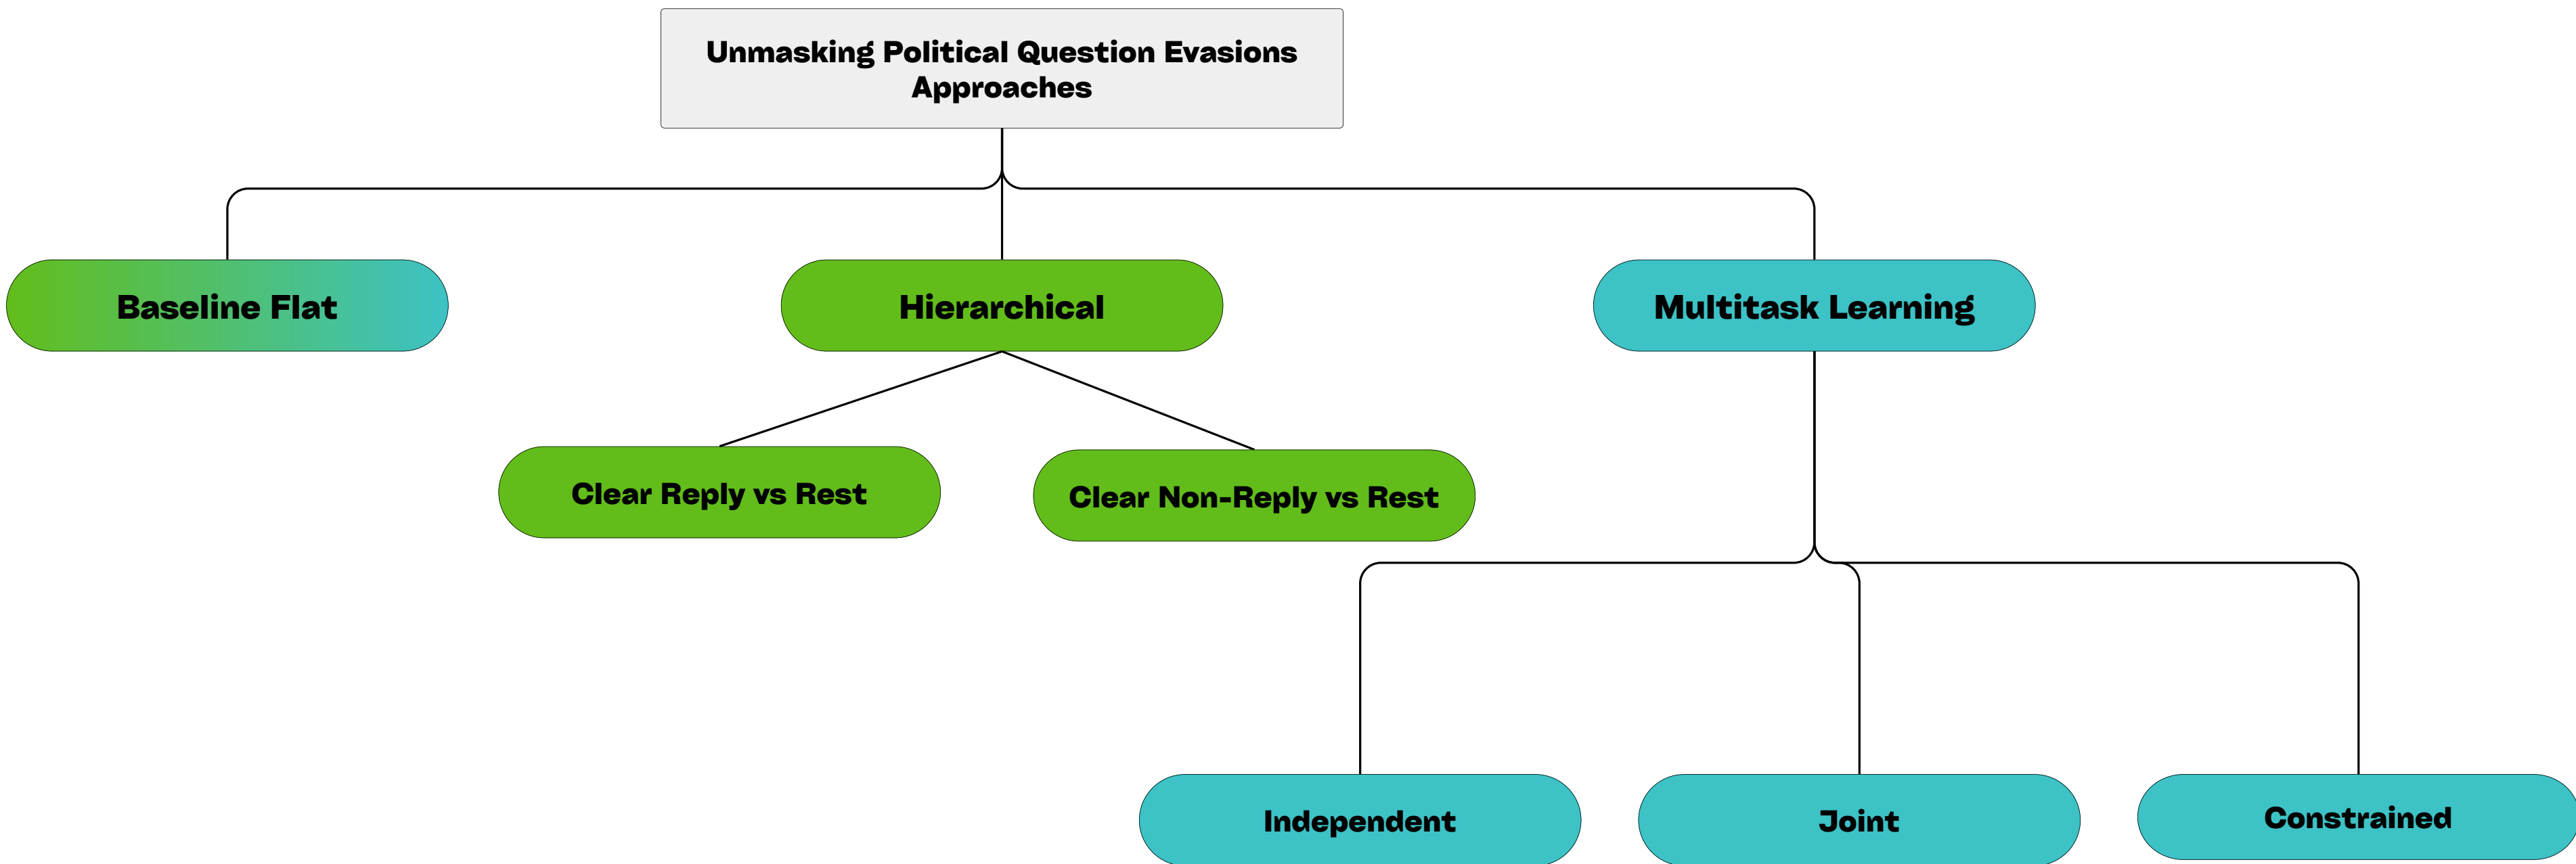

Supplement: SupplementaryMaterial [file cropped specijalno za matiju akrapa.pdf › figures/cropped specijalno za matiju akrapa.pdf]

- Used for evasion task
- Used for clarity task

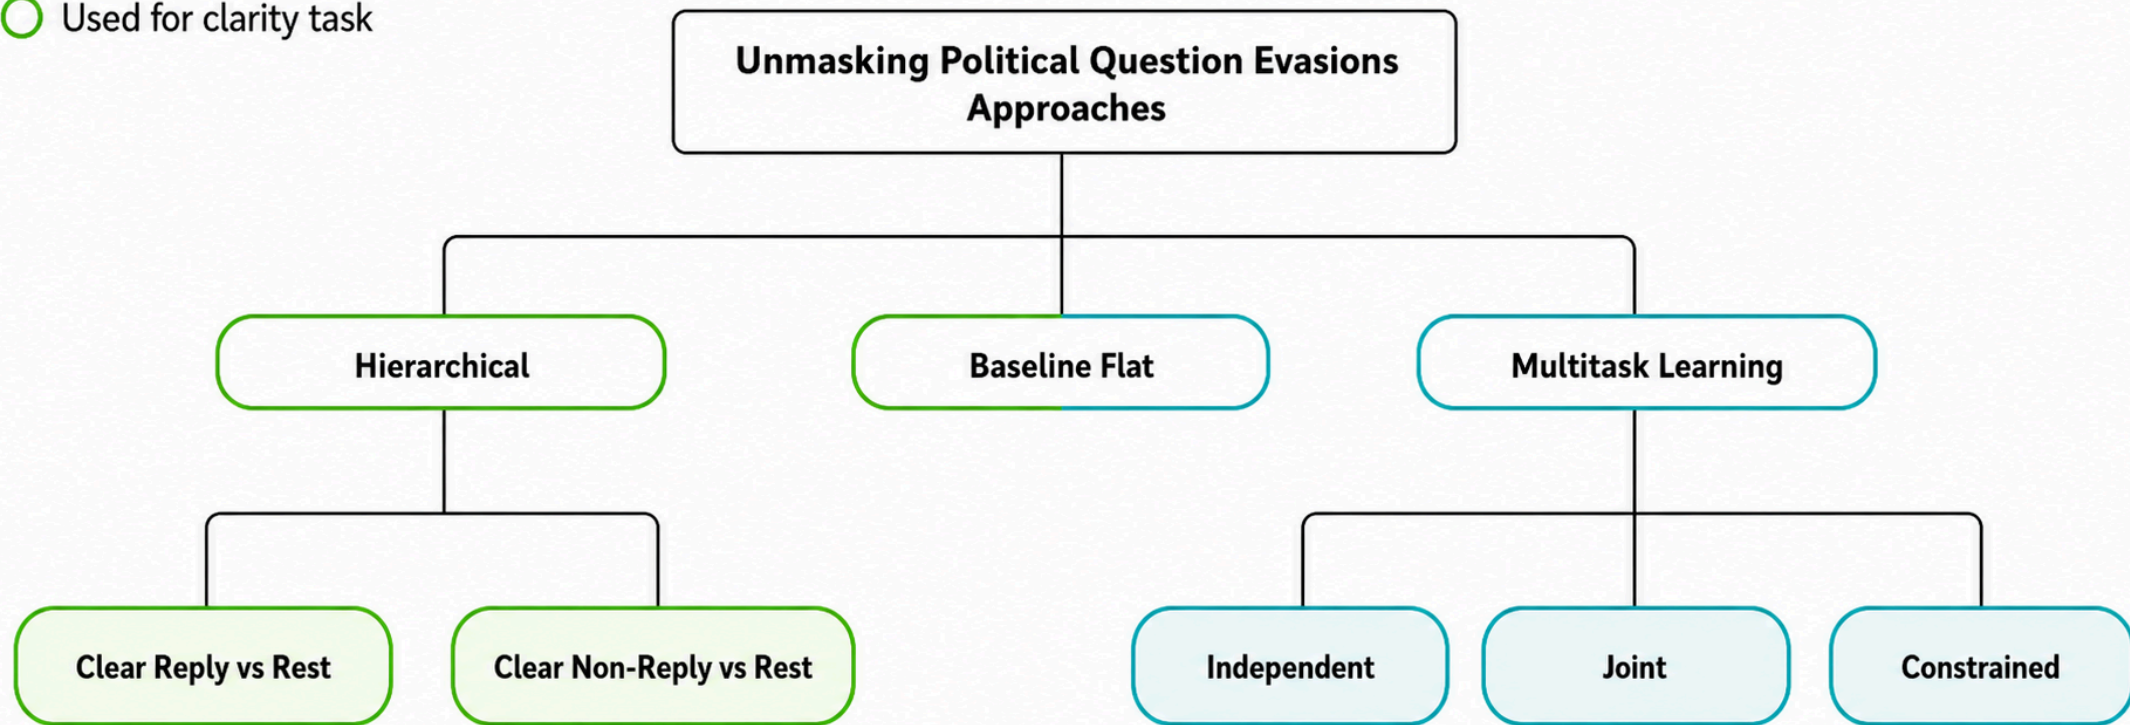

Supplement: SupplementaryMaterial [file methodology_diagram.pdf › figures/methodology_diagram.pdf]
